# Supplementary material
Source: MDPI journal article supplement (https://www.mdpi.com/2313-0105/8/10/131)
Supplement: s1 [file s1]

Supplementary materials for  
**Sosnowski Hogweed-based hard carbons for sodium-ion batteries**

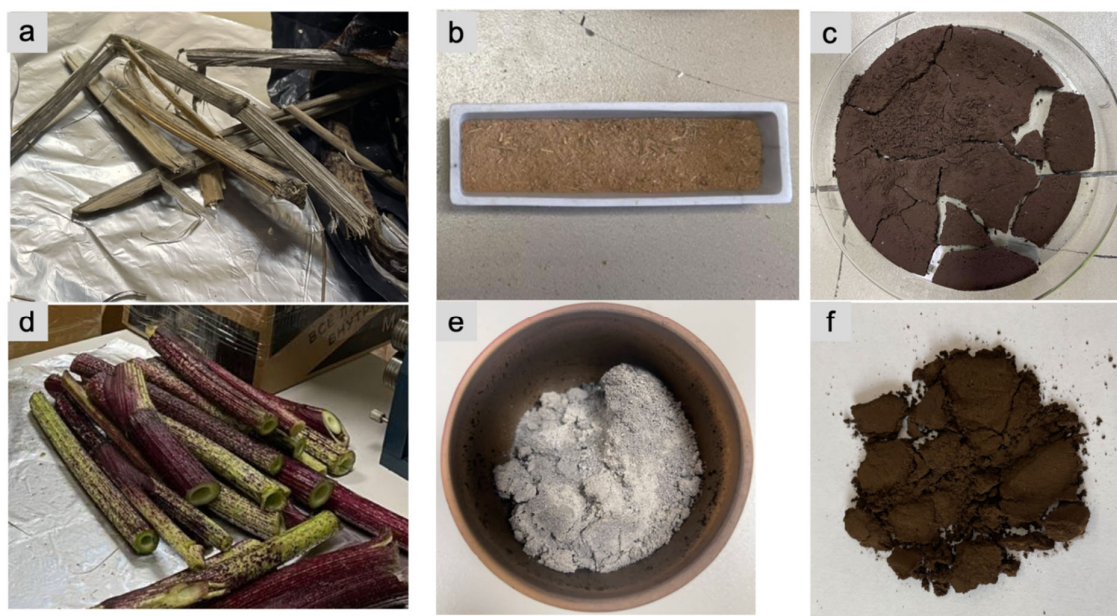

**Figure S1.** Photo images of winter (WH) (a) and summer (SH) (d) hogweed stems and intermediate products WH-A200 (b), WH-H200 (c), SH-A200HCl before HCl treatment (e), SH-H200 (f).

**Table S1.** Results of CHNSO analysis. Results presented as weight percent  $\pm$  standard deviation (n=3).

| Sample     | C, % | $\pm\%$ | H, % | $\pm\%$ | N, % | $\pm\%$ | S, %  | $\pm\%$ | O, % | $\pm\%$ | Total, % |
|------------|------|---------|------|---------|------|---------|-------|---------|------|---------|----------|
| WH         | 44.8 | 0.4     | 6.46 | 0.13    | 0.44 | 0.06    | 0.86  | 0.09    | 41.1 | 0.6     | 93.7     |
| WH-A200    | 46.2 | 0.4     | 5.99 | 0.01    | 1.38 | 0.25    | 0.83  | 0.08    | 40.2 | 0.1     | 94.6     |
| WH-H200    | 58.2 | 0.5     | 5.62 | 0.21    | 0.51 | 0.01    | 0.67  | 0.07    | 38.4 | 0.1     | 103.4    |
| SH         | 37.8 | 0.2     | 5.74 | 0.17    | 1.09 | 0.09    | 0.17  | 0.03    | 43.5 | 0.1     | 88.3     |
| SH-A200HCl | 68.4 | 0.5     | 4.59 | 0.03    | 2.67 | 0.11    | <0.10 | -       | 20.7 | 0.7     | 96.4     |
| SH-H200    | 61.9 | 0.2     | 5.21 | 0.01    | 1.93 | 0.02    | <0.10 | -       | 20.3 | 0.1     | 89.3     |

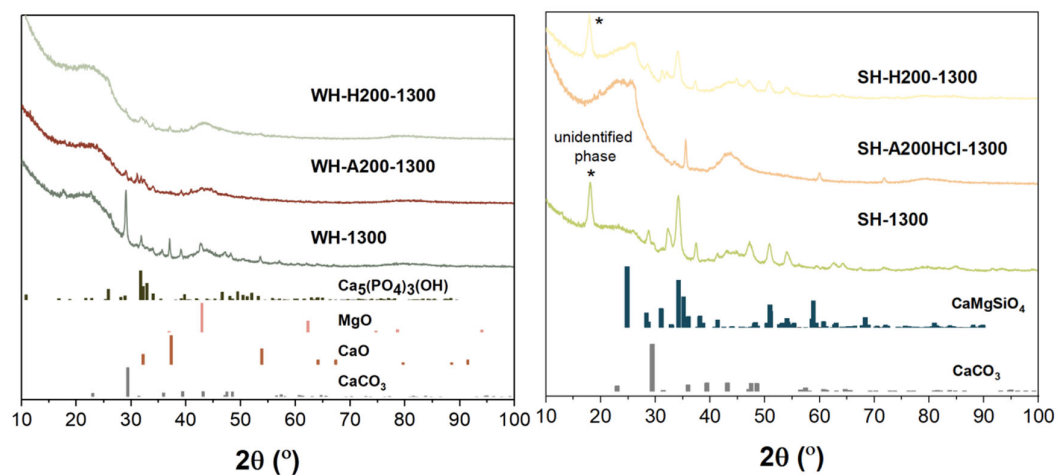

**Figure S2.** PXRD data of different hard carbons.

**Table S2.** Results of the EDX analysis of HC samples.

|                 | C (%)* | Mg (%) | Si (%) | P (%) | K (%) | Ca (%) | Fe (%) | S (%) |
|-----------------|--------|--------|--------|-------|-------|--------|--------|-------|
| WH-1300         | 99.23  | 0.06   | 0.14   | 0.03  | 0.08  | 0.47   | 0      | 0     |
| WH-A200-1300    | 96.95  | 0      | 0.15   | 0.18  | 0.67  | 2.05   | 0      | 0     |
| WH-H200-1300    | 99.85  | 0      | 0      | 0     | 0     | 0.15   | 0      | 0     |
| SH-1300         | 96.08  | 0.10   | 0.05   | 0.26  | 1.22  | 2.30   | 0      | 0     |
| SH-A200HCl-1300 | 97.54  | 0      | 0.85   | 0.10  | 1.18  | 0.12   | 0.20   | 0     |
| SH-H200-1300    | 96.16  | 0      | 0.09   | 0.24  | 0.65  | 2.71   | 0      | 0.14  |

\*All results in atomic %

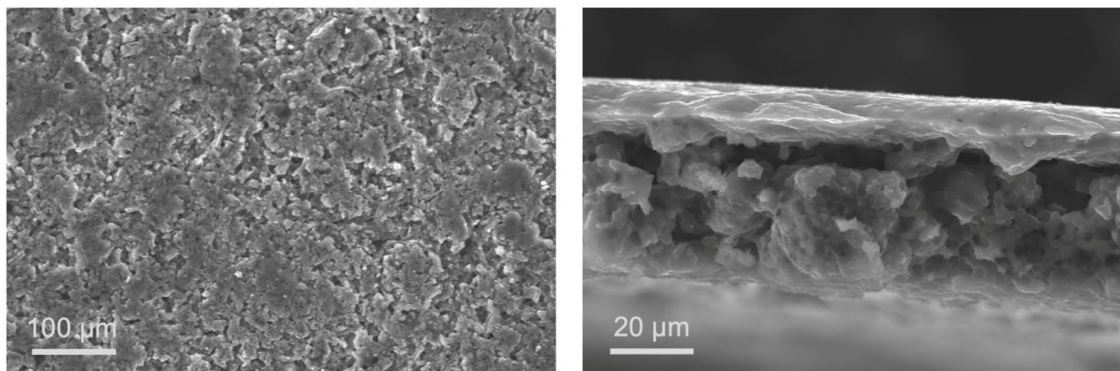

**Figure S3.** SEM images of SH-1300 electrode after 10 cycles at C/10.

**Table S3.** Comparison with hard carbon from the literature .

| Precursor       | Preparation conditions                               | Capacity                          | ICE | Ref.      |
|-----------------|------------------------------------------------------|-----------------------------------|-----|-----------|
| WH-A200-1300    | Air pre-treatment, carbonization at 1300 °C          | 262 mAhg <sup>-1</sup> at 25 mA/g | 74% | this work |
| SH-A200HCl-1300 | Air and acid pre-treatment, carbonization at 1300 °C | 221 mAhg <sup>-1</sup> at 25 mA/g | 87% | this work |

|                |                                                     |                                    |       |      |
|----------------|-----------------------------------------------------|------------------------------------|-------|------|
| Garlic         | Carbonization at 1300 °C                            | 260 mAhg <sup>-1</sup> at 0.05 A/g | 50.7% | [39] |
| Peanut shell   | Hydrothermal pre-treatment, carbonization at 800 °C | 261 mAhg <sup>-1</sup> at 0.1 C    | 58%   | [40] |
| Tea Leaves     | Hydrothermal pre-treatment, carbonization at 600 °C | 179 mAhg <sup>-1</sup> at 100 mA/g | 70%   | [41] |
| Spinifex Grass | Carbonization at 1000 °C                            | 366 mAhg <sup>-1</sup> at 20 mA/g  | 50%   | [42] |
| Recycled cork  | Carbonization at 1600 °C                            | 385 mAhg <sup>-1</sup>             | 81%   | [43] |

## References

39. Liu, H.; Liu, X.; Wang, H.; Zheng, Y.; Zhang, H.; Shi, J.; Liu, W.; Huang, M.; Kan, J.; Zhao, X.; Li, D. High-Performance Sodium-Ion Capacitor Constructed by Well-Matched Dual-Carbon Electrodes from a Single Biomass. *ACS Sustain Chem Eng*2019, 7 (14), 12188–12199. [https://doi.org/10.1021/ACSSUSCHEMENG.9B01370/SUPPL\\_FILE/SC9B01370\\_SI\\_001.PDF](https://doi.org/10.1021/ACSSUSCHEMENG.9B01370/SUPPL_FILE/SC9B01370_SI_001.PDF).
40. Ren, X.; Xu, S. D.; Liu, S.; Chen, L.; Zhang, D.; Qiu, L. Lath-Shaped Biomass Derived Hard Carbon as Anode Materials with Super Rate Capability for Sodium-Ion Batteries. *Journal of Electroanalytical Chemistry*2019, 841, 63–72. <https://doi.org/10.1016/J.JELECHEM.2019.04.033>.
41. Arie, A. A.; Tekin, B.; Demir, E.; Demir-Cakan, R. Utilization of The Indonesian's Spent Tea Leaves as Promising Porous Hard Carbon Precursors for Anode Materials in Sodium Ion Batteries. *Waste Biomass Valorization*2020, 11 (6), 3121–3131. <https://doi.org/10.1007/S12649-019-00624-X/TABLES/2>.
42. Gaddam, R. R.; Jiang, E.; Amiralian, N.; Annamalai, P. K.; Martin, D. J.; Kumar, N. A.; Zhao, X. S. Spinifex Nanocellulose Derived Hard Carbon Anodes for High-Performance Sodium-Ion Batteries. *Sustain Energy Fuels*2017, 1 (5), 1090–1097. <https://doi.org/10.1039/C7SE00169J>.
43. Li, Y.; Lu, Y.; Meng, Q.; S Jensen, A. C.; Zhang, Q.; Zhang, Q.; Tong, Y.; Qi, Y.; Gu, L.; Titirici, M.-M.; Hu, Y.-S.; Li, Y. Q.; Lu, Y. X.; Meng, Q. S.; Zhang, Q. Q.; Qi, Y. R.; Hu, Y.; S Jensen, A. C.; Zhang, Q. H.; Tong, Y. X.; Gu, L.; Titirici, M. Regulating Pore Structure of Hierarchical Porous Waste Cork-Derived Hard Carbon Anode for Enhanced Na Storage Performance. *Adv Energy Mater*2019, 9 (48), 1902852. <https://doi.org/10.1002/AENM.201902852>.
